# Supplementary material for: Deep Learning for Automatically Visual Evoked Potential Classification During Surgical Decompression of Sellar Region Tumors
Source: PubMed Central journal article supplement — Transl Vis Sci Technol. 2019 Nov 20;8(6):21. doi: 10.1167/tvst.8.6.21 (PMC6871542; doi:10.1167/tvst.8.6.21), 2019-11-20
Supplement: tvst-08-06-26_s01.pdf [file tvst-08-06-26_s01.pdf]

**Before anesthesia**

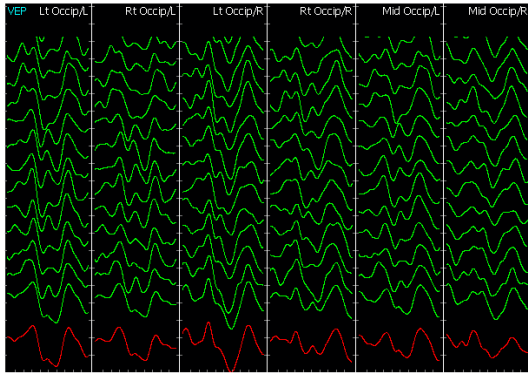

**After anesthesia**

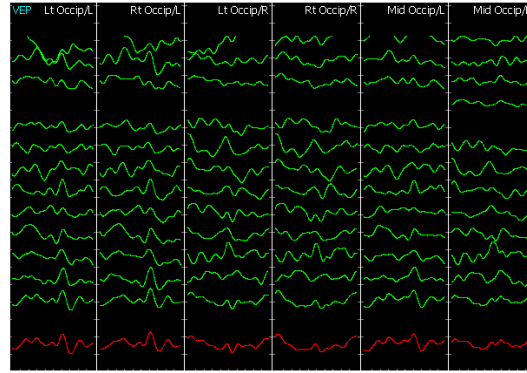

Supplement Figure. Visual evoked potential before and after anesthesia
