# Supplementary material for: Deep Learning for Automatically Visual Evoked Potential Classification During Surgical Decompression of Sellar Region Tumors
Source: PubMed Central journal article supplement — Transl Vis Sci Technol. 2019 Nov 20;8(6):21. doi: 10.1167/tvst.8.6.21 (PMC6871542; doi:10.1167/tvst.8.6.21), 2019-11-20
Supplement: tvst-08-06-26_s02.pdf [file tvst-08-06-26_s02.pdf]

Supplement Table 1. Structure of the model only with convolutional neural network

| Layer (type)                                                                          | Output Shape         | Param #   |
|---------------------------------------------------------------------------------------|----------------------|-----------|
| ConvLayer 1                                                                           | (None, 348, 348, 32) | 896       |
| Max pooling layer 1                                                                   | (None, 174, 174, 32) | 0         |
| ConvLayer 2                                                                           | (None, 172, 172, 64) | 18496     |
| Max pooling layer 2                                                                   | (None, 86, 86, 64)   | 0         |
| ConvLayer 3                                                                           | (None, 84, 84, 128)  | 73856     |
| Max pooling layer 3                                                                   | (None, 42, 42, 128)  | 0         |
| Flatten 1                                                                             | (None, 225792)       | 0         |
| Dense 1                                                                               | (None, 512)          | 115606016 |
| Dense 2                                                                               | (None, 3)            | 1539      |
| Total params: 115,700,803<br>Trainable params: 115,700,803<br>Non-trainable params: 0 |                      |           |

Supplement Table 2. Structure of the model with transfer learning

| Layer (type)                                                                                 | Output Shape        | Param #  |
|----------------------------------------------------------------------------------------------|---------------------|----------|
| vgg19 (Model)                                                                                | (None, 10, 10, 512) | 20024384 |
| Dense 1                                                                                      | (None, 256)         | 13107456 |
| Dense 2                                                                                      | (None, 3)           | 771      |
| Total params: 33,132,611<br>Trainable params: 13,108,227<br>Non-trainable params: 20,024,384 |                     |          |

Supplement Table 3. Structure of the model combining convolutional and recurrent neural network

| Layer (type)                                                                  | Output Shape             | Param # |
|-------------------------------------------------------------------------------|--------------------------|---------|
| ConvLayer 1                                                                   | (None, None, 23, 88, 32) | 896     |
| Max pooling layer 1                                                           | (None, None, 11, 44, 32) | 0       |
| ConvLayer 2                                                                   | (None, None, 9, 42, 64)  | 18496   |
| Max pooling layer 2                                                           | (None, None, 4, 21, 64)  | 0       |
| ConvLayer 3                                                                   | (None, None, 2, 19, 128) | 73856   |
| Max pooling layer 3                                                           | (None, None, 1, 9, 128)  | 0       |
| LSTM 1                                                                        | (None, 128)              | 655872  |
| Dense 1                                                                       | (None, 3)                | 387     |
| Total params: 749,507<br>Trainable params: 749,507<br>Non-trainable params: 0 |                          |         |
